# Supplementary material
Source: PubMed Central journal article supplement (PMC2758650)
Supplement: NIHMS139387-supplement-01.pdf [file NIHMS139387-supplement-01.pdf]

## **SUPPLEMENTAL MATERIALS**

CIRCULATIONAHA/2008/846501/R2

### **Propranolol decreases tachycardia and improves symptoms in the Postural Tachycardia Syndrome (POTS): Less is More**

Satish R Raj MD MSCI (\*§), Bonnie K Black RN CNP (\*), Italo Biaggioni MD (\*§),  
Sachin Y Paranjape BS (\*), Maricelle Ramirez (\*), William D. Dupont PhD (\$) and  
David Robertson MD (\*§¶)

Autonomic Dysfunction Center, Division of Clinical Pharmacology, Departments of  
Medicine (\*), Pharmacology (§), Neurology (¶), and Biostatistics (\$), Vanderbilt  
University, Nashville, Tennessee, USA.

**Supplemental Table 1.** Orthostatic Diastolic Blood Pressure Values in Protocol #1

(propranolol 20mg and placebo) and Protocol #2 (low dose [20 mg] vs. high dose [80

mg] propranolol) in patients with Postural Tachycardia Syndrome.

|                                | <b>Pre</b>       | <b>2 Hours Post</b> | <b>4 Hours Post</b> | <b>RM ANOVA</b>             |
|--------------------------------|------------------|---------------------|---------------------|-----------------------------|
|                                | <b>Mean ± SD</b> | <b>Mean ± SD</b>    | <b>Mean ± SD</b>    | <b>P Value</b>              |
| <b>Protocol #1 (n=54)</b>      |                  |                     |                     |                             |
| <b>Delta (Standing-Seated)</b> |                  |                     |                     |                             |
| <b>DBP (mmHg)</b>              |                  |                     |                     |                             |
| Propranolol 20mg               | 5.9 ± 7.7        | 5.1 ± 9.2           | 5.7 ± 7.8           |                             |
| Placebo                        | 6.3 ± 12.0       | 3.1 ± 9.1           | 3.1 ± 9.6           |                             |
| P value (between drugs)        | NS               | NS                  | NS                  | 0.148 (P <sub>Drug</sub> )  |
| <b>Standing DBP (mmHg)</b>     |                  |                     |                     |                             |
| Propranolol 20mg               | 74.4 ± 8.1       | 70.8 ± 7.8          | 72.0 ± 8.3          |                             |
| Placebo                        | 73.8 ± 12.8      | 72.4 ± 9.6          | 73.9 ± 9.8          |                             |
| P value (between drugs)        | NS               | NS                  | NS                  | 0.037 (P <sub>Drug</sub> )  |
| <b>Sitting DBP (mmHg)</b>      |                  |                     |                     |                             |
| Propranolol 20mg               | 68.5 ± 8.4       | 65.6 ± 9.2          | 66.3 ± 9.1          |                             |
| Placebo                        | 67.5 ± 8.4       | 69.4 ± 8.9          | 70.8 ± 8.8          |                             |
| P value (between drugs)        | NS               | <0.001              | <0.001              | <0.001 (P <sub>Drug</sub> ) |
| <b>Protocol #2 (n=18)</b>      |                  |                     |                     |                             |
| <b>Delta (Standing-Seated)</b> |                  |                     |                     |                             |

---

| <b>DBP (mmHg)</b>          |             |             |            |                            |
|----------------------------|-------------|-------------|------------|----------------------------|
| Propranolol Low Dose       | 5.7 ± 8.9   | 3.3 ± 7.6   | 5.9 ± 6.8  |                            |
| Propranolol High Dose      | 4.7 ± 10.1  | 5.2 ± 9.9   | 4.1 ± 7.4  |                            |
| P value (between drugs)    | NS          | NS          | NS         | 0.465 (P <sub>Drug</sub> ) |
| <b>Standing DBP (mmHg)</b> |             |             |            |                            |
| Propranolol Low Dose       | 72.9 ± 9.2  | 69.9 ± 10.1 | 74.1 ± 8.0 |                            |
| Propranolol High Dose      | 72.8 ± 12.5 | 70.7 ± 10.2 | 68.9 ± 7.9 |                            |
| P value (between drugs)    | NS          | NS          | 0.043      | 0.080 (P <sub>Drug</sub> ) |
| <b>Sitting DBP (mmHg)</b>  |             |             |            |                            |
| Propranolol Low Dose       | 67.3 ± 9.4  | 66.7 ± 9.6  | 68.2 ± 8.9 |                            |
| Propranolol High Dose      | 68.1 ± 6.5  | 65.4 ± 7.2  | 64.8 ± 7.1 |                            |
| P value (between drugs)    | NS          | NS          | NS         | 0.125 (P <sub>Drug</sub> ) |

---

RM ANOVA – Repeated measures analysis of variance; SD – standard deviation; DBP – diastolic blood pressure; NS – not significant. RM ANOVA was used to determine the P value for the overall change between the study drugs and paired comparisons were made using within model contrasts. P<0.05 was considered significant.

**Supplemental Table 2.** Change in total and component symptom scores from baseline to 2 hours following propranolol dose: Differential effects of low dose (20 mg) and high dose (80 mg) propranolol in patients with Postural Tachycardia Syndrome (n=18).

|                    | <b>Low Dose</b>    |                | <b>High Dose</b>   |                |
|--------------------|--------------------|----------------|--------------------|----------------|
|                    | <b>Propranolol</b> |                | <b>Propranolol</b> |                |
|                    | <b>Mean ± SD</b>   | <b>P Value</b> | <b>Mean ± SD</b>   | <b>P Value</b> |
| <b>Total Score</b> | -11.0 ± 12.3       | 0.003          | -5.7 ± 12.6        | 0.074          |
| Mental Clouding    | -1.2 ± 1.3         | 0.002          | -0.2 ± 1.5         | 0.653          |
| Visual Disturbance | -0.8 ± 1.8         | 0.097          | -0.6 ± 1.5         | 0.126          |
| Short of Breath    | -1.9 ± 2.0         | 0.002          | -1.1 ± 2.6         | 0.106          |
| Palpitation        | -2.6 ± 2.6         | 0.001          | -1.8 ± 2.3         | 0.005          |
| Tremulousness      | -1.4 ± 1.9         | 0.009          | -1.3 ± 2.4         | 0.031          |
| Chest Pains        | -0.6 ± 1.5         | 0.155          | -0.1 ± 2.0         | 0.813          |
| Headache           | -0.7 ± 1.5         | 0.072          | 0.1 ± 1.4          | 0.868          |
| Lightheadedness    | -1.6 ± 2.1         | 0.008          | -0.3 ± 2.3         | 0.577          |
| Nausea             | -0.4 ± 1.1         | 0.130          | -0.4 ± 1.3         | 0.177          |

SD – standard deviation. Comparisons between each study dose and “no change” were made using a 1 group t-test. P<0.05 was considered significant.
